# Supplementary material
Source: PubMed Central journal article supplement (PMC4033659)
Supplement: jm5000563_si_001.pdf [file jm5000563_si_001.pdf]

# **Design and Synthesis of Systemically Active Metabotropic Glutamate Subtype-2 and -3 (mGlu<sub>2/3</sub>) Receptor Positive Allosteric Modulators (PAMs): Pharmacological Characterization and Assessment in a Rat Model of Cocaine Dependence.**

*Raveendra-Panickar Dhanya<sup>†,1</sup>, Douglas J. Sheffler<sup>†,1</sup>, Russell Dahl<sup>1</sup>, Melinda Davis<sup>1</sup>, Pooi San Lee<sup>1</sup>, Li Yang<sup>1</sup>, Hilary Highfield Nickols<sup>3,4</sup>, Hyekyung P. Cho<sup>2,4</sup>, Layton H. Smith, Manoranjan S. D'Souza<sup>5</sup>, P. Jeffrey Conn<sup>2,4</sup>, Andre Der-Avakian<sup>5</sup>, Athina Markou<sup>5</sup>, Nicholas D. P. Cosford<sup>\*1</sup>*

<sup>1</sup>Cell Death and Survival Networks Program and Conrad Prebys Center for Chemical Genomics, Sanford-Burnham Medical Research Institute, 10901 N. Torrey Pines Rd., La Jolla, CA 92037. Departments of <sup>2</sup>Pharmacology, <sup>3</sup>Pathology, and <sup>4</sup>Vanderbilt Center for Neuroscience Drug Discovery, Vanderbilt University Medical Center, Nashville, TN 37232. <sup>5</sup>Department of Psychiatry, School of Medicine, University of California San Diego, La Jolla, CA 92093.

## **Supporting Information**

### **Plasma-Protein Binding**

Pipeline Pilot was used to determine an estimate of plasma-protein binding for selected analogues. The details of the QSAR model used for prediction are as follows:

The model was trained on a data set of 260 compounds as described in Dixon and Merz, *J. Med. Chem.*, **44**, 2001, pp. 3795-3809, and an additional 594 compounds from Votano et. al, *J. Med. Chem.*, **49**, 2006, pp. 7169-7181. However, the modeling methodology described in the Dixon et. al. paper was not used; instead, modified Bayesian learning (described in Xia, Maliski, Gallant, and Rogers, *J. Med. Chem.*, **47**, 2004, pp. 4463-4470) was performed.

This component contains a model useful for predicting Plasma-Protein binding, that is, whether

or not a compound is likely to be highly bound ( $\geq 90\%$  bound) to carrier proteins in the blood. The model outputs the value *ADMET\_EXT\_PPB#Prediction*. If true, the compound is predicted to be a binder ( $\geq 90\%$ ). Otherwise, it is predicted to be a weak or non-binder ( $< 90\%$ ).

The outputs in Table S1 defined as follows:

- § NormalizedProbability (PPB): The standard Laplacian-modified Bayesian score.
- § Enrichment (PPB#Enrichment): An estimate of enrichment, that is, the increased likelihood (versus random) of this sample being in the "good" category.
- § EstPGood (PPB#EstPGood): The estimated probability that the sample is in the "good" category, based on an assumed normal distribution of scores within the good and non-good categories.
- § Prediction: A True/False prediction using the best cutoff value estimated from leave-one-out cross-validation. The cutoff is chosen to minimize the average of the false positive rate and false negative rate.

**Table S1:** Predicted plasma protein binding for selected compounds.

| Compound  | PPB   | PPB#Enrichment | PPB#EstPGood | PPB#Prediction       |
|-----------|-------|----------------|--------------|----------------------|
| <b>20</b> | 3.830 | 1.540          | 0.593        | True ( $\geq 90\%$ ) |
| <b>36</b> | 6.190 | 1.611          | 0.621        | True ( $\geq 90\%$ ) |
| <b>44</b> | 4.720 | 1.568          | 0.604        | True ( $\geq 90\%$ ) |
| <b>50</b> | 4.374 | 1.557          | 0.600        | True ( $\geq 90\%$ ) |
| <b>60</b> | 5.996 | 1.605          | 0.618        | True ( $\geq 90\%$ ) |
| <b>65</b> | 5.531 | 1.592          | 0.613        | True ( $\geq 90\%$ ) |
| <b>68</b> | 4.294 | 1.554          | 0.599        | True ( $\geq 90\%$ ) |
| <b>72</b> | 4.219 | 1.552          | 0.598        | True ( $\geq 90\%$ ) |
| <b>73</b> | 4.565 | 1.563          | 0.602        | True ( $\geq 90\%$ ) |
| <b>74</b> | 4.183 | 1.551          | 0.598        | True ( $\geq 90\%$ ) |
| <b>75</b> | 6.292 | 1.613          | 0.622        | True ( $\geq 90\%$ ) |

**Table S2.** Off-target profiling data for compound **72**.<sup>a</sup>

| Receptor/Target                                               | Species    | Cpd 72<br>% inhibition <sup>b</sup> |
|---------------------------------------------------------------|------------|-------------------------------------|
| Adrenergic $\alpha_{1A}$                                      | Human      | -10.5                               |
| Adrenergic $\alpha_{1B}$                                      | Human      | -17.1                               |
| Adrenergic $\alpha_{1D}$                                      | Human      | -3.6                                |
| Adrenergic $\alpha_{2A}$                                      | Human      | -7.7                                |
| Adrenergic $\alpha_{2B}$                                      | Human      | 11.5                                |
| Adrenergic $\alpha_{2C}$                                      | Human      | 0.6                                 |
| Adrenergic $\beta_1$                                          | Human      | -7.3                                |
| Adrenergic $\beta_2$                                          | Human      | 0.7                                 |
| Adrenergic $\beta_3$                                          | Human      | 24.8                                |
| Benzodiazepine (brain, [ <sup>3</sup> H]Flunitrazepam)        | Rat        | -11.2                               |
| Dopamine D <sub>1</sub>                                       | Human      | 1.9                                 |
| Dopamine D <sub>2</sub>                                       | Human      | 1.0                                 |
| Dopamine D <sub>3</sub>                                       | Human      | -28.2                               |
| Dopamine D <sub>4</sub>                                       | Human      | -2.9                                |
| Dopamine D <sub>5</sub>                                       | Human      | -0.9                                |
| GABA <sub>A</sub> (brain, [ <sup>3</sup> H]Muscimol)          | Rat        | 11.0                                |
| Histamine H <sub>1</sub>                                      | Human      | 0.2                                 |
| Histamine H <sub>2</sub>                                      | Human      | (> 10 $\mu$ M)                      |
| Histamine H <sub>3</sub>                                      | Guinea pig | -5.2                                |
| Histamine H <sub>4</sub>                                      | Human      | (> 10 $\mu$ M)                      |
| Muscarinic M <sub>1</sub>                                     | Human      | -6.6                                |
| Muscarinic M <sub>2</sub>                                     | Human      | -1.0                                |
| Muscarinic M <sub>3</sub>                                     | Human      | 8.3                                 |
| Muscarinic M <sub>4</sub>                                     | Human      | -0.9                                |
| Muscarinic M <sub>5</sub>                                     | Human      | -3.8                                |
| Opiate $\delta$ (OP1, DOP)                                    | Human      | 13.7                                |
| Opiate $\kappa$ (OP2, KOP)                                    | Human      | 31.2                                |
| Opiate $\mu$ (OP3, MOP)                                       | Human      | 11.1                                |
| Peripheral benzodiazepine receptor ([ <sup>3</sup> H]PK11195) | Rat        | 1.0                                 |
| Serotonin (5-Hydroxytryptamine) 5-HT <sub>1A</sub>            | Human      | -10.2                               |
| Serotonin (5-Hydroxytryptamine) 5-HT <sub>1B</sub>            | Human      | 16.2                                |
| Serotonin (5-Hydroxytryptamine) 5-HT <sub>1D</sub>            | Human      | 60.7 (> 10 $\mu$ M)                 |
| Serotonin (5-Hydroxytryptamine) 5-HT <sub>1E</sub>            | Human      | -5.2                                |
| Serotonin (5-Hydroxytryptamine) 5-HT <sub>2A</sub>            | Human      | -0.6                                |
| Serotonin (5-Hydroxytryptamine) 5-HT <sub>2B</sub>            | Human      | 7.9                                 |
| Serotonin (5-Hydroxytryptamine) 5-HT <sub>2C</sub>            | Human      | 20.2                                |
| Serotonin (5-Hydroxytryptamine) 5-HT <sub>3</sub>             | Human      | -15.3                               |
| Serotonin (5-Hydroxytryptamine) 5-HT <sub>5A</sub>            | Human      | 4.5                                 |
| Serotonin (5-Hydroxytryptamine) 5-HT <sub>6</sub>             | Human      | -1.1                                |
| Serotonin (5-Hydroxytryptamine) 5-HT <sub>7</sub>             | Human      | 1.8                                 |
| Sigma $\sigma_1$                                              | Rat        | -11.3                               |
| Sigma $\sigma_2$                                              | Rat        | 6.6                                 |
| Transporter, Dopamine (DAT)                                   | Human      | -7.7                                |
| Transporter, Norepinephrine (NET)                             | Human      | -4.8                                |
| Transporter, Serotonin (5-Hydroxytryptamine) (SERT)           | Human      | 0.3                                 |

<sup>a</sup>Compound **72** was tested for displacement of radioligand binding activity at 10  $\mu$ M. Assays were performed by the NIMH Psychoactive Drug Screening Program (UNC Chapel Hill) unless otherwise noted. <sup>b</sup>Inhibition at 10  $\mu$ M as a percentage of displacement of the respective radioligand at each target. IC<sub>50</sub> values where applicable are shown in parentheses.
